# Supplementary material for: Developments toward the Implementation of 44Sc Production at a Medical Cyclotron
Source: PubMed Central journal article supplement (PMC7587374; doi:10.3390/molecules25204706), 2020-10-14
Supplement: molecules-25-04706-s001.pdf [file molecules-25-04706-s001.pdf]

1 Article: Supplementary Information

## 2 **Developments towards the Implementation of $^{44}\text{Sc}$** 3 **Production at a Medical Cyclotron**

4 **Nicholas P. van der Meulen<sup>1,2\*</sup>, Roger Hasler<sup>2</sup>, Zeynep Talip<sup>2</sup>, Pascal V. Grundler<sup>2</sup>, Chiara**  
5 **Favaretto<sup>2</sup>, Christoph A. Umbricht<sup>2</sup>, Cristina Müller<sup>2</sup>, Gaia Dellepiane<sup>3</sup>, Tommaso S. Carzaniga<sup>3</sup>,**  
6 **Saverio Braccini<sup>3</sup>**

7 <sup>1</sup> Laboratory of Radiochemistry, Paul Scherrer Institute, 5232 Villigen-PSI, Switzerland

8 <sup>2</sup> Center of Radiopharmaceutical Sciences ETH-PSI-USZ, Paul Scherrer Institute, 5232 Villigen-PSI,  
9 Switzerland

10 <sup>3</sup> Albert Einstein Center for Fundamental Physics, Laboratory of High Energy Physics, University of Bern,  
11 3012 Bern, Switzerland

12 \* Correspondence: nick.vandermeulen@psi.ch

13

### 14 **Content**

- 15 1. Challenges of CaO target preparation
- 16 2. Comparison of degassing of CaCO<sub>3</sub> and CaO targets during irradiation
- 17 3. Investigation of beam centering using gafchromic films
- 18 4. LC-ESI-TOF-MS analysis
- 19 5. Radionuclidic impurities
- 20 6. Radiolabeling and preclinical application of  $^{44}\text{Sc}$ -PSMA-ALB-56
- 21 7. References

### 22 **1. Challenges of CaO target preparation**

23 Upon exposure to air, CaO undergoes hydration through adsorption of moisture, yielding  
24 calcium hydroxide and subsequent carbonation (which involves CO<sub>2</sub> fixation) to form calcium  
25 carbonate. The net reaction of this process can be represented by:

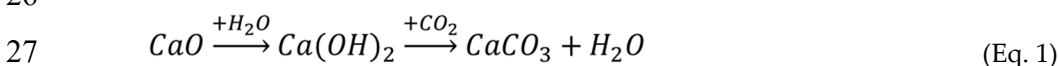

27  
28  
29 The hydration process is fast, while the following carbonation process is slow, due to the  
30 difference in water and CO<sub>2</sub> concentration in air [1]. This indicates that, when using CaO as target  
31 material, further measures have to be taken in order to prevent hydration and carbonation.

32  
33 The severity of such measures was investigated by exposing prepared CaO powder to air and  
34 measuring X-ray Diffraction (XRD) spectra at different exposure times (0 h, 4 h, 16 h; Figure S1). Peaks  
35 corresponding to the diffraction pattern of Ca(OH)<sub>2</sub> can be identified in the spectra after 16 h  
36 exposure. The data, however, indicates that the overall crystallinity of the material decreases over  
37 time, as can be seen in the spectra recorded after 4 h. This could mean amorphisation of the present  
38 phases (CaO and Ca(OH)<sub>2</sub>) and/or a formation of an amorphous CaCO<sub>3</sub> phase. Such secondary phase  
39 formations lead to changes of the crystal structure and result in volume changes (density  $\rho_{\text{CaO}} > \rho_{\text{CaCO}_3}$   
40  $> \rho_{\text{Ca}(\text{OH})_2}$ ). This has negative effects on prepared pellets from CaO powder, leading to cracking and  
41 breaking when exposed to air. Taking this into consideration, directly after conversion of CaCO<sub>3</sub> the  
42 resultant CaO powder was pressed into target pellets, while the exposure time was kept to a  
43 minimum ( $\leq 1$  h). The resultant targets were encapsulated and stored under inert gas or in a desiccator  
44 under vacuum.

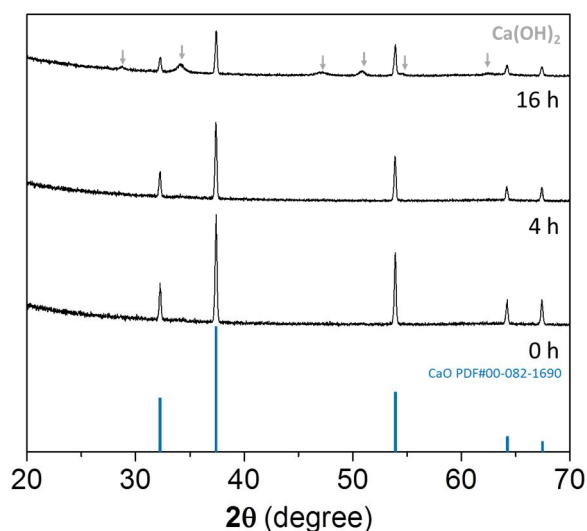

45  
46 **Figure S1.** X-ray diffraction patterns of CaO powder exposed to air at different time points.  
47 Arrows indicate the Ca(OH)<sub>2</sub> phase.  
48

49 Target holders used for irradiations at the Bern medical cyclotron only seal completely when  
50 pressed together with 6 bars of pressure within the target station. Outside the target station, held  
51 together only by the magnets of the “coin”, the target holder exhibits a gap between front cover and  
52 back part, as confirmed by three-dimensional measurements using a KEYENCE VR-3000 G2  
53 profilometer (Figure S2). It is important, therefore, to store such encapsulated targets under inert  
54 conditions to prevent secondary phase formations as indicated by XRD (Figure S3). Disastrous results  
55 were observed when such measures were not taken in the preparation of targets (Figure S4).  
56

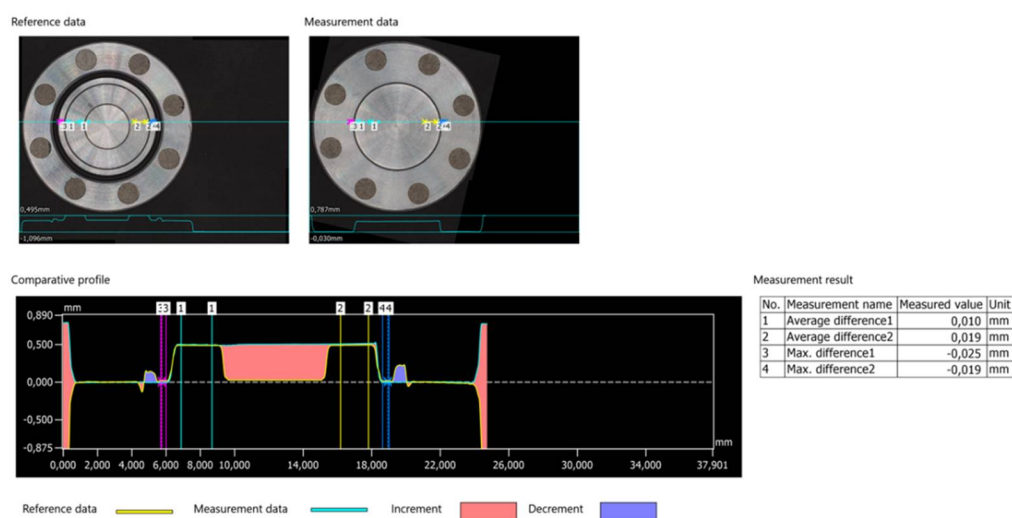

57  
58 **Figure S2.** Profile overlap of front and back part of the IBA cyclotron target holder measured on  
59 a KEYENCE VR-3000 G2 profilometer. Comparison of the profiles indicates an insufficient sealing if  
60 just closed by magnets without external pressure.  
61

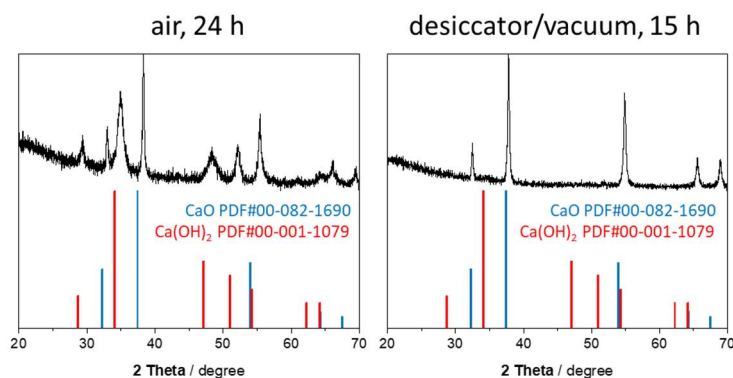

**Figure S3.** X-ray diffraction (intensity) patterns of CaO pellets encapsulated in a magnetic coin target holder and stored under air (*left*) or under vacuum (*right*). Storage of encapsulated targets in air leads to a crystalline Ca(OH)<sub>2</sub> phase formation and amorphisation of overall crystallinity (as indicated by an increased signal-to-noise ratio in the normalized spectra).

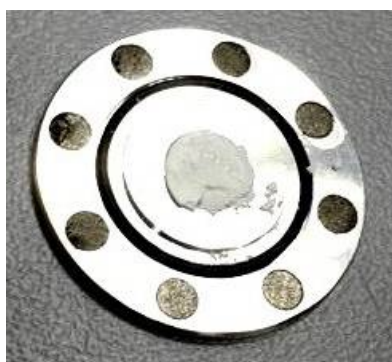

**Figure S4.** Example of target that was left exposed to the elements for too long, resulting in the CaO target material absorbing moisture and resulting in rupture. The target could not be used for irradiation.

## 2. Comparison of degassing of CaCO<sub>3</sub> and CaO targets during irradiation

The first irradiation was performed at the Bern medical cyclotron using CaCO<sub>3</sub> pellets. This irradiation had to be stopped after a few minutes, at beam currents of about 1 μA, due to an air contamination radiation safety alarm provoking the shutdown of the ventilation in the cyclotron bunker. Figure S5 shows the measurement of air contamination at the main exhaust of the facility on the day irradiation. The signals (shown as broad peaks), due to <sup>41</sup>Ar produced in air by neutrons via the <sup>40</sup>Ar(n,γ)<sup>41</sup>Ar nuclear reaction during routine <sup>18</sup>F production, are clearly visible together with the huge peak due to the <sup>44</sup>Sc production test. The peak can be explained by the fact that, due to the increase of temperature, CaCO<sub>3</sub> decomposed to CaO and CO<sub>2</sub>, leading to high pressure inside the capsule that decreased the thermal exchange between the pellet and the coin. This provoked the melting on the O-ring and the release of a large amount of radioactive gas. The analysis of the half-life of the exhaust gas showed that it consists of <sup>13</sup>N produced by the reaction <sup>16</sup>O(n, α)<sup>13</sup>N [2]. This negative result demonstrated that the use of CaCO<sub>3</sub> pellets is not possible. For this reason, CaCO<sub>3</sub> pellets were abandoned and CaO targets developed.

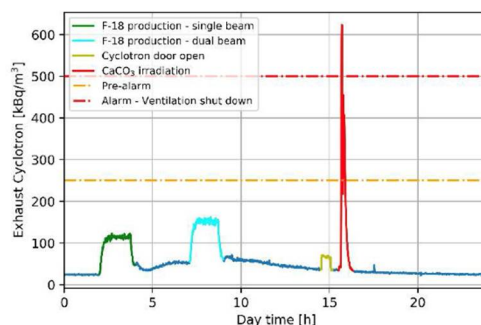

87  
88 **Figure S5.** Exhaust radioactivity in air of the Bern cyclotron bunker on the day of the first test  
89 with a  $\text{CaCO}_3$  target [2].

90  
91 The use of  $\text{CaO}$  pellets proved to be successful also from a radiation protection point-of-view.  
92 The radioactive gas released by the target was found to be far from the alarm values and had little  
93 influence on the total amount of radioactivity released in the atmosphere by the whole facility, as  
94 shown in Figure S6.

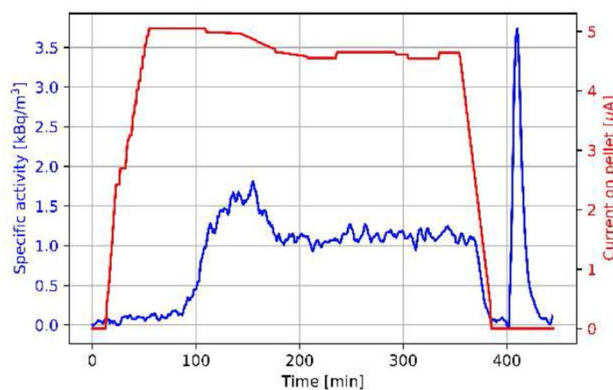

96  
97 **Figure S6.** Exhaust radioactivity in air of the whole Bern cyclotron laboratory during a typical  
98 irradiation of a  $\text{CaO}$  target for  $^{44}\text{Sc}$  production. The peak after EOB corresponds to the transfer of the  
99 irradiated target disc [2].

100  
101 The amount of released radioactivity in form of  $^{13}\text{N}$  was found to be comparable to  $^{41}\text{Ar}$   
102 produced during  $^{18}\text{F}$  runs, thus, causing no problem from a radiation safety perspective. As shown  
103 in Figure S6, a peak was observed after EOB due to the release of radioactive gas as soon as the piston  
104 pressing the target in the solid target station was released. For this reason, a conservative waiting  
105 period of about 30 minutes after EOB (corresponding to about three  $^{13}\text{N}$  half-lives) was adopted  
106 before releasing the piston to reduce the release of radioactive gas into the air of the bunker.

### 108 3. Investigation of beam centering using Gafchromic films

109 It was found that the reading of the beam current on target and on the 12 mm diameter collimator  
110 was not correct over the irradiation periods 2 to 5 (Table 2). This was due to a faulty connection  
111 leading to a bad centering of the beam on the pellet. In some cases, only the tail of the beam was  
112 hitting the target material, thus, producing low yields. In order to evaluate where the beam hit the  
113 target, the front cover of target coin was placed in contact with Gafchromic film (Gafchromic EBT2,  
114 QD+, International Specialty Products, U.S.A.) (Figure S7).

115

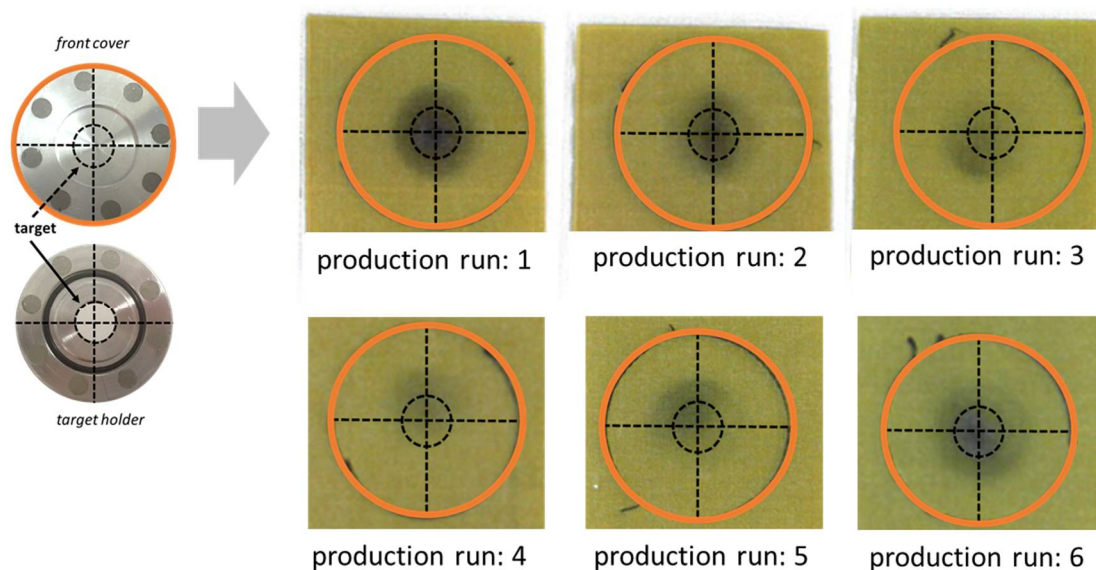

116  
117 **Figure S7.** Gafchromic foils after exposure to the irradiated front cover of the magnetic coin  
118 target holders used for  $^{44}\text{Sc}$  production at the Bern medical cyclotron. The dotted circle corresponds  
119 to the 6 mm diameter pellet.

120  
121 It can be seen that the beam was not correctly centered for runs 3, 4 and 5. These experimental  
122 measurements demonstrate the importance of an accurate positioning of the beam.

#### 123 4. LC-ESI-TOF-MS analysis

124 For some of the irradiations performed at the IBA cyclotron, problems were encountered in  
125 removing the irradiated target from the target holder. In these cases (production runs 3 – 5), the target  
126 holder was placed directly into the 1.0 M  $\text{HNO}_3$  solution and the target dissolved. This led to a  
127 leaching of Sm from the samarium-cobalt magnets (part of the target holder sealing mechanism)  
128 (Figure S8) [3]. This resulted in a poor radiolabeling capability of the final product (see Table 2, main  
129 manuscript), since Sm and Sc show similar behavior on DGA resin under the given conditions and,  
130 therefore, cannot be separated. [4] Potential leaching of Co from the magnets does not contaminate  
131 the final product, because Co does not sorb on DGA resin in  $\text{HNO}_3$  and, therefore, is washed out in  
132 the first step of the separation procedure. [4]

133  
134 LC-ESI-TOF-MS analysis was performed on the decayed final product to confirm the presence  
135 of Sm in the eluate (Figure S9). To prepare the sample, an aliquot ( $\sim 20 \mu\text{L}$ ) of  $^{44}\text{Sc}$  product solution  
136 was diluted to  $25 \mu\text{L}$  using 0.05 M HCl and the pH adjusted to 4.5 with 0.5 M sodium acetate.  
137 DOTANOC peptide ( $2 \mu\text{L}$ , 1 mM) was added and the sample incubated at  $95 \text{ }^\circ\text{C}$  for 15 min. A  
138 reference sample consisting of HCl, sodium acetate and DOTANOC was prepared using the same  
139 procedure. A  $10\text{-}\mu\text{L}$  aliquot of the resultant sample, mixed with  $20 \mu\text{L}$  EDTA solution, was used for  
140 LC-ESI-TOF-MS analysis using the operating parameters specified in Table S1.

141  
142 **Table S1.** LC-ESI-TOF-MS operating parameters.

| LC conditions      |                                       |
|--------------------|---------------------------------------|
| Column ACE         | ACE (150 * 3 mm), $3 \mu\text{m}$ C18 |
| Flow rate          | 0.6 mL/min                            |
| Column temperature | $40 \text{ }^\circ\text{C}$           |
| Injection volume   | $20 \mu\text{L}$                      |
| Mobile phase       | A: ACN 0.1% formic acid               |

143

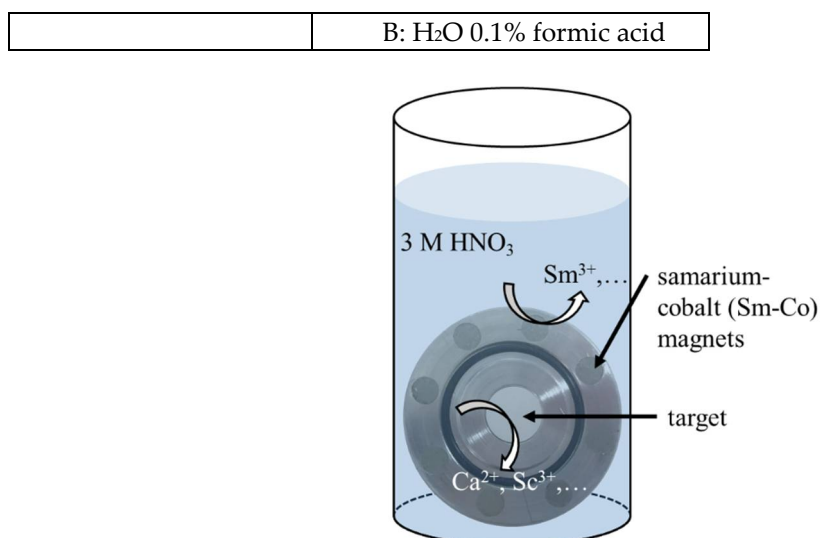

144

145

146

147

148

**Figure S8.** Schematic representation of a target holder placed in HNO<sub>3</sub> in order to dissolve the sticking target out of the holder. The strong acidic condition led to leaching of Sm and other contaminants from the Sm-Co magnets into the target solution.

**a) DOTA-NOC reference sample**

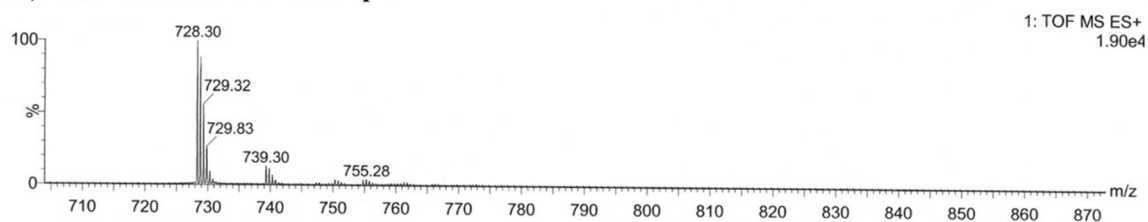

**b) production run 1 (IBA cyclotron)**

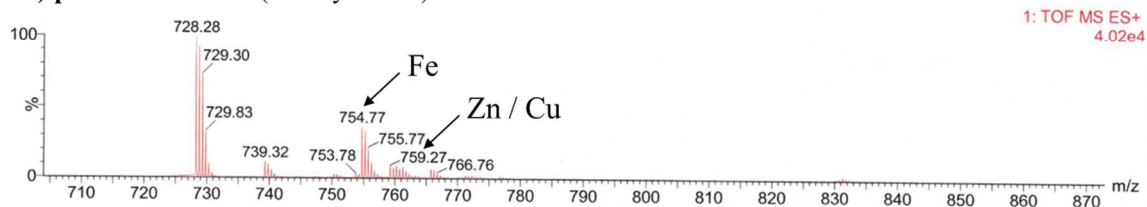

**c) Production run 3 (IBA cyclotron)**

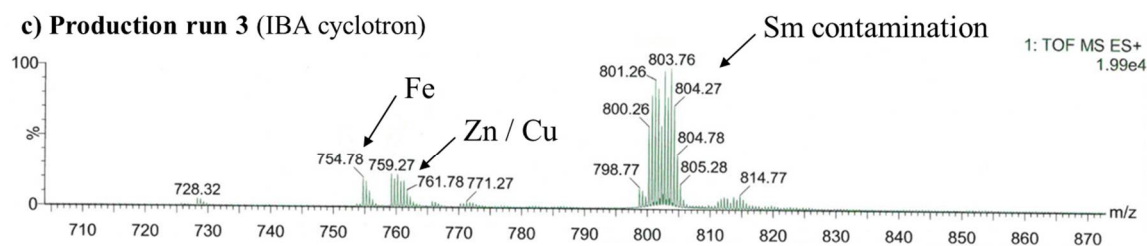

**d) theoretical DOTA-NOC – Sm**

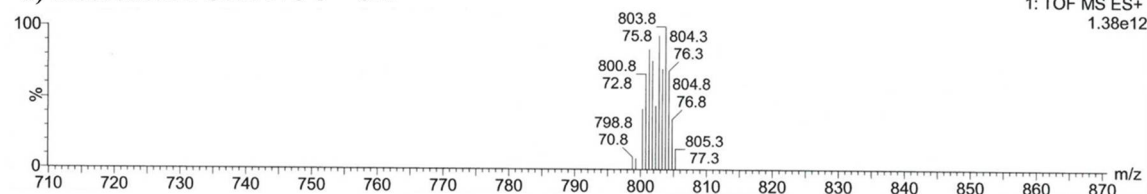

149

150

151

152

153

**Figure S9.** LC-ESI-TOF-MS spectra of DOTA-NOC reference sample (a), decayed <sup>44</sup>Sc-DOTANOC sample of IBA cyclotron production run 1 (b) and 3 (c), theoretical Sm-DOTANOC (d).

## 154 5. Radionuclidic impurities

155 In order to evaluate the amount of low-activity radionuclidic impurities, long-term  $\gamma$ -  
 156 spectrometry of partially decayed  $^{44}\text{Sc}$  eluate was measured (Fig. S10). Other than the final product  
 157 containing  $^{44}\text{Sc}$  and  $^{44\text{m}}\text{Sc}$  (~2 %), trace amounts of  $^{88}\text{Y}$  (~0.0013 %) were also discovered. This is likely  
 158 due to the Sr impurity in the target material (Figure S11), where the  $^{88}\text{Y}$  is formed via the  $^{\text{nat}}\text{Sr}(p,n)^{88}\text{Y}$   
 159 nuclear reaction.  
 160

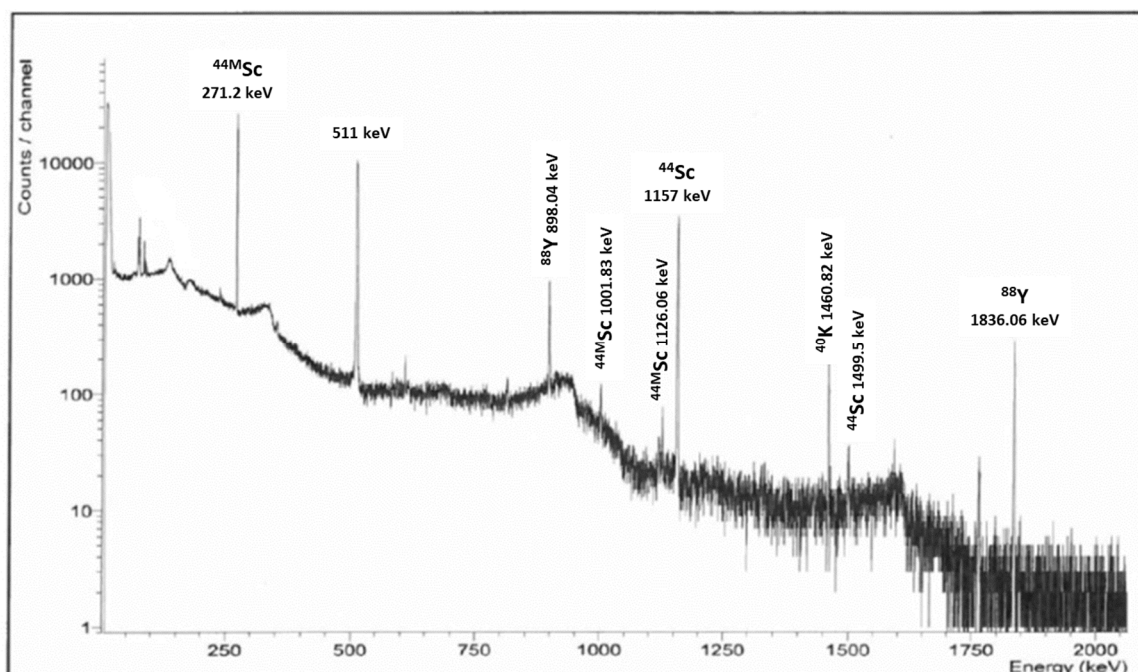

161 **Figure S10.** Representative long-term  $\gamma$ -spectrometry of partially decayed  $^{44}\text{Sc}$  eluate (Dead time  
 162 = 0.16%, count rate = 35.779 cps, Acquisition Time = 73731 s). Measurements were performed about 1  
 163 month after EOS.  
 164  
 165

Form:  $\text{CaCO}_3$  (Carbonate)

Isotopic composition:

| Isotope        | 40   | 42   | 43   | 44              | 46     | 48   |
|----------------|------|------|------|-----------------|--------|------|
| Enrichment (%) | 2.89 | 0.06 | 0.03 | 97.00+/-<br>0.2 | <0.002 | 0.02 |

Chemical Impurities:

| Element   | Symbol | Impurity Measurement (ppm) |
|-----------|--------|----------------------------|
| Aluminum  | Al     | 30                         |
| Barium    | Ba     | <20                        |
| Chlorine  | Cl     | 20                         |
| Copper    | Cu     | 30                         |
| Iron      | Fe     | 40                         |
| Magnesium | Mg     | 70                         |
| Manganese | Mn     | <10                        |
| Sodium    | Na     | <20                        |
| Nickel    | Ni     | <10                        |
| Lead      | Pb     | 40                         |
| Silicon   | Si     | <30                        |
| Strontium | Sr     | 160                        |

166 **Figure S11.** Excerpt from Certificate of Analysis for enriched  $^{44}\text{CaCO}_3$  from TRACE Sciences,  
 167 U.S.A.  
 168  
 169  
 170  
 171  
 172  
 173

## 174 6. Radiolabeling and preclinical application of $^{44}\text{Sc}$ -PSMA-ALB-56

### 175 6.1 Preparation of $^{44}\text{Sc}$ -PSMA-ALB-02

176 The chemical structure of PSMA-ALB-02 ligand is shown in Figure S12. It comprises a DOTA-  
177 chelator for coordination of the  $^{44}\text{Sc}$ . The *p*-iodophenyl-moiety was used as an albumin binder in order  
178 to increase the radioligand's blood circulation time and, hence, uptake in the tumor.

179 A representative HPLC chromatogram of the quality control of  $^{44}\text{Sc}$ -PSMA-ALB-02 is shown in  
180 Figure S13.  
181

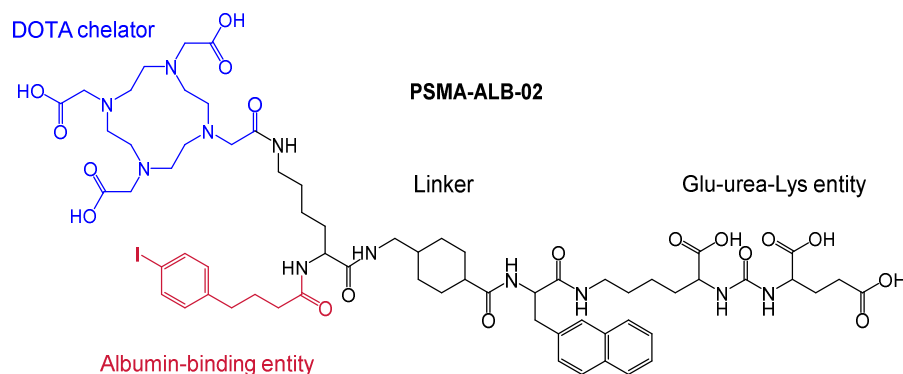

182  
183

184 **Figure S12.** Chemical structure of PSMA-ALB-02 consisting of a DOTA-chelator (blue), an  
185 albumin-binding entity (red) and a glutamate-urea-lysine (Glu-urea-Lys)-based PSMA-binding  
186 entity.  
187

188 A representative HPLC chromatogram of the  $^{44}\text{Sc}$ -PSMA-ALB-01 is shown in Figure S13.  
189

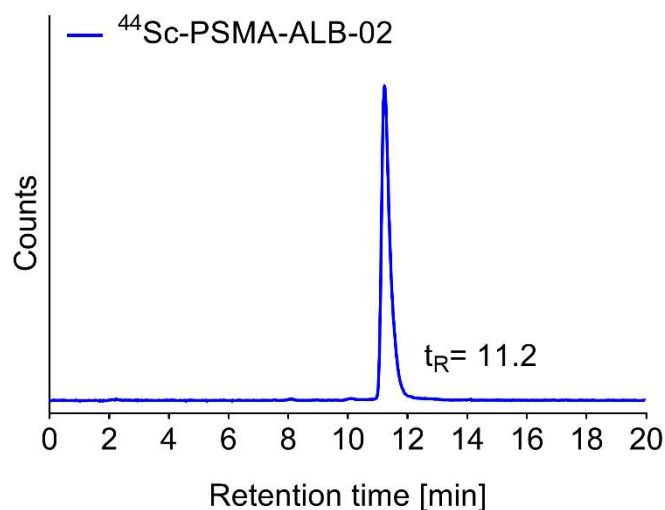

190  
191  
192  
193

**Figure S13.** Representative chromatogram of  $^{44}\text{Sc}$ -PSMA-ALB-02, demonstrating the product  
192 peak and its retention time in minutes ( $t_R = 11.2$  min).  
193

### 194 6.2 Biodistribution Studies in Tumor-Bearing Mice

195  $^{44}\text{Sc}$ -PSMA-ALB-02 (5 MBq, 1 nmol, 100-200  $\mu\text{L}$ ) was injected in the tail vein of tumor-bearing  
196 mice. Mice were sacrificed at 1 h and 4 h post injection (p.i.) of  $^{44}\text{Sc}$ -PSMA-ALB-02 (n = 3). Selected  
197 tissues and organs were collected, weighed and measured using a  $\gamma$ -counter (Perkin Elmer, Wallac  
198 Wizard 1480). The results were decay-corrected and listed as a percentage of the injected activity per  
199 gram of tissue mass (% IA/g). In line with the concept of the albumin-binding properties with PSMA-  
200 ALB-02, the initial blood activity level after injection of  $^{44}\text{Sc}$ -PSMA-ALB-02 was, at 19 % IA/g at 1 h  
201 p.i., relatively high but decreased to 7 % IA/g at 4 h p.i.. Fast accumulation of activity was observed  
202 in the PSMA-positive PC-3 PIP tumor (47 % IA/g; 1 h p.i.), which increased further over time and



203 almost doubled (87 % IA/g; 4 h p.i.) over the following hours of distribution (Figure 9). The uptake in  
 204 PSMA-negative PC-3 flu tumors was even low at both time points of investigation (6-7 % IA/g). The  
 205 same held true for other non-targeted organs and tissues, including the liver and muscles. The uptake  
 206 of  $^{44}\text{Sc}$ -PSMA-ALB-02 in the kidneys was high ( $77 \pm 10$  % IA/g) at 1 h p.i. and slowly cleared over the  
 207 first few hours after injection ( $58 \pm 6$  % IA/g; 4 h p.i.) (Figure S14).  
 208

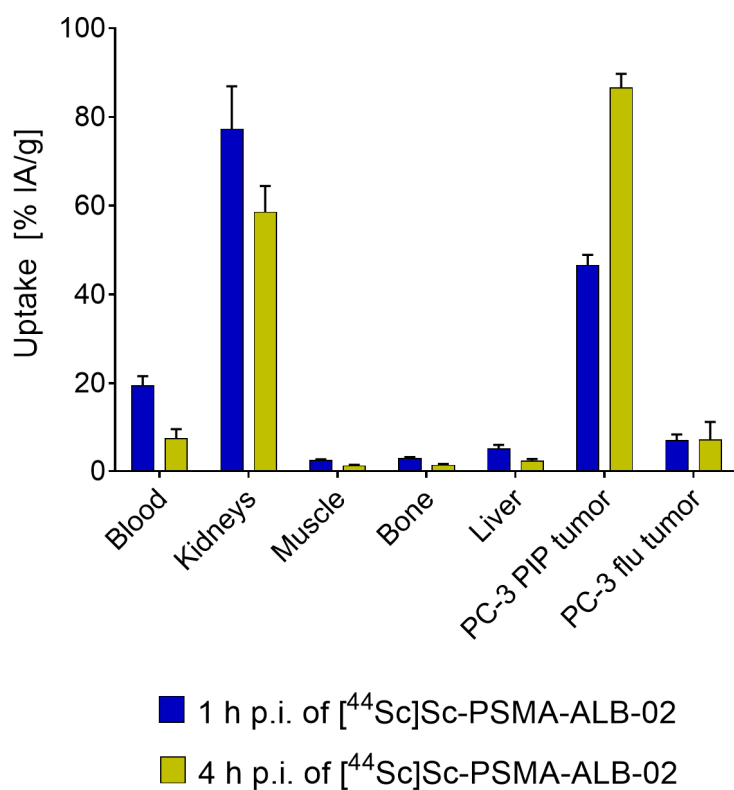

209  
 210  
 211  
 212  
 213  
 214

**Figure S14.** Biodistribution data obtained 1 h and 4 h after injection of  $^{44}\text{Sc}$ Sc-PSMA-ALB-02 in PC-3 PIP/flu tumor-bearing nude mice. Values are indicated as average  $\pm$  SD (n = 3).

## 7. References

- 215  
 216  
 217  
 218  
 219  
 220  
 221  
 222  
 223
1. Morales-Flórenz V., Santos A., Romero-Hermida, I., Esquivias L. Hydration and carbonation reactions of calcium oxide by weathering: kinetics and changes in the nanostructure, *Chem. Eng. J.* 2015, 265, 194-200.
  2. T. S. Carzaniga, Study of Scandium Radio-isotope Production for Theranostics with medical Cyclotrons, PhD Thesis, University of Bern, 2019.
  3. Sinha M. K., Pramanik S., Kumari A., Sahu S. K. et al. Recovery of value added products of Sm and Co from waste SmCo magnet by hydrometallurgical route, *Sep. Purif. Technol.* 2017, 179, 1-12.
  4. Pourmand A., Dauphas N. Distribution coefficients of 60 elements on TODGA resin: Application to Ca, Lu, Hf, U and Th isotope geochemistry, *Talanta* 2010, 81, 741-753.

224

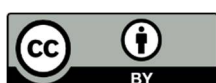

© 2020 by the authors. Submitted for possible open access publication under the terms and conditions of the Creative Commons Attribution (CC BY) license (<http://creativecommons.org/licenses/by/4.0/>).

225
